# Supplementary material for: Improved global daily nitrogen dioxide concentrations from 2005 to 2023 derived using a deep learning approach
Source: Copernicus journal article supplement (doi:10.5194/essd-2025-821), 2026-01-14
Supplement: Supplementary file 1 [file essd-2025-821-supplement.pdf]

# *Supporting information for “Improved global daily nitrogen dioxide concentrations from 2005 to 2023 derived using a deep learning approach”*

Jiangshan Mu<sup>1,2#</sup>, Chenliang Tao<sup>3,1#</sup>, Yuqiang Zhang<sup>1\*</sup>, Zhou Liu<sup>1</sup>, Yingnan Zhang<sup>4</sup>, Na Zhao<sup>1</sup>, Bin Luo<sup>1</sup>, Qionghui Zhou<sup>1</sup>, Qingzhu Zhang<sup>1</sup>, Hongliang Zhang<sup>3</sup>, Likun Xue<sup>1\*</sup>

<sup>1</sup>Environment Research Institute, Shandong University, 266237, Qingdao, China

<sup>2</sup>Nicholas School of the Environment, Duke University, 27708, Durham, USA

<sup>3</sup>Department of Environmental Science and Engineering, Fudan University, 200233, Shanghai, China

<sup>4</sup>Department of Earth System Science, University of California, Irvine, 92697, California, USA

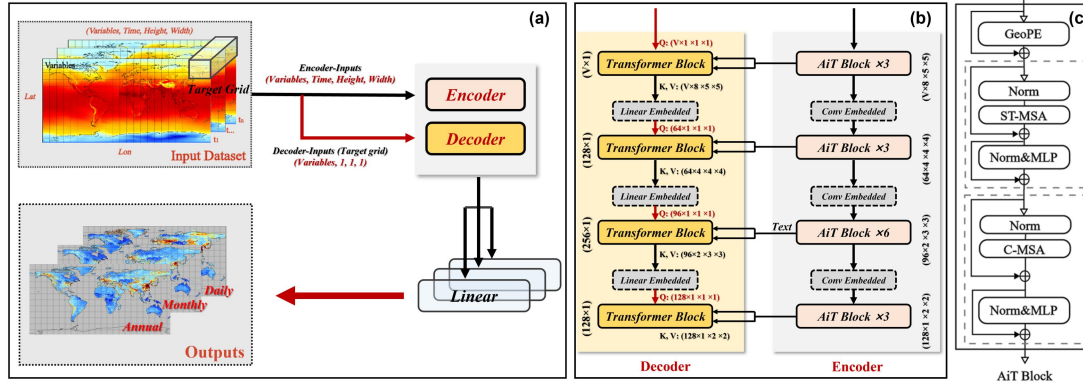

Figure S1: Sequential overview of Full Model Workflow for global surface NO<sub>2</sub> estimations: (a), schematic diagram of Air Transformer (AiT) model; (b), the structure of the Decoder and Encoder in the model; (c), the structure of the AiT Block. GeoPE, Norm, MLP, ST-MSA, and C-MSA respectively indicate positional embedding, layer normalization, multi-layer perceptron, spatial-temporal multi-head self-attention, and multi-channel (multi-variables) multi-head self-attention.

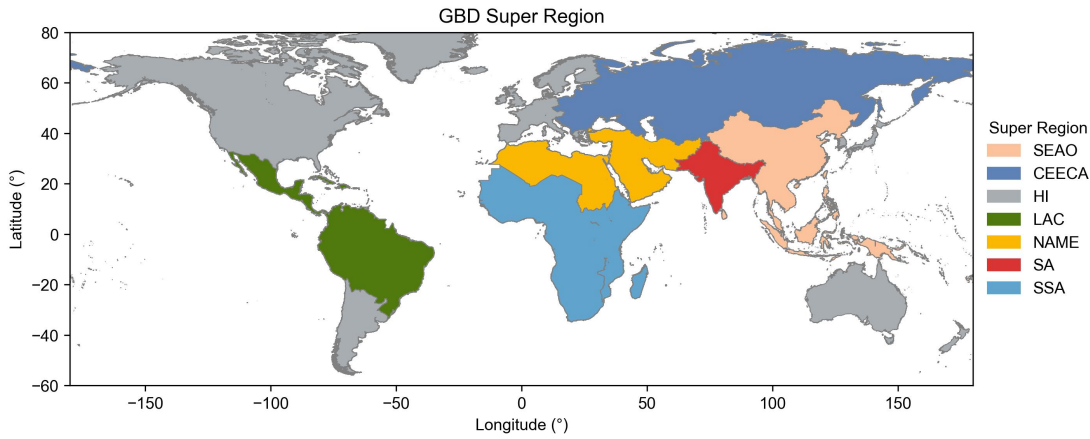

Figure S2. GBD Super-regions based on epidemiological similarity and geographic closeness. The abbreviations are as follows: South-East Asia, East Asia & Oceania (SEAO), Central Europe, Eastern Europe & Central Asia (CEECA), High-income (HI), Latin America & Caribbean (LAC), North Africa & Middle East (NAME), South Asia (SA), and Sub-Saharan Africa (SSA).

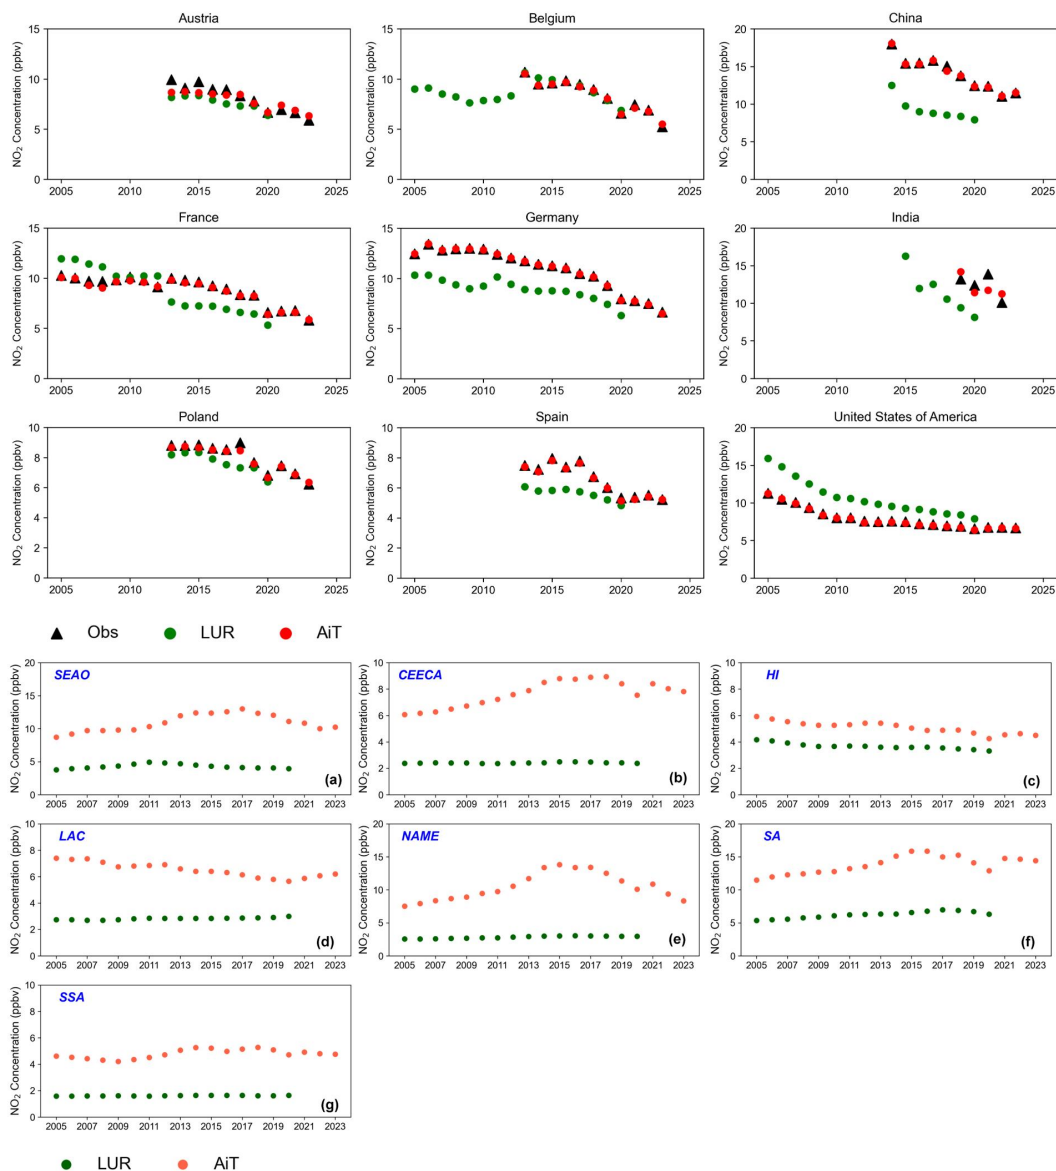

Figure S3. Comparison of  $\text{NO}_2$  concentrations between LUR and AiT. top panel for comparisons from 1990 to 2023 across nine countries: Austria, Belgium, China, France, Germany, India, Poland, Spain, and the United States of America, including surface observation (black triangles), LUR (green dots), and AiT (red dots); bottom panel shows the comparisons between LUR and AiT for the seven super regions.

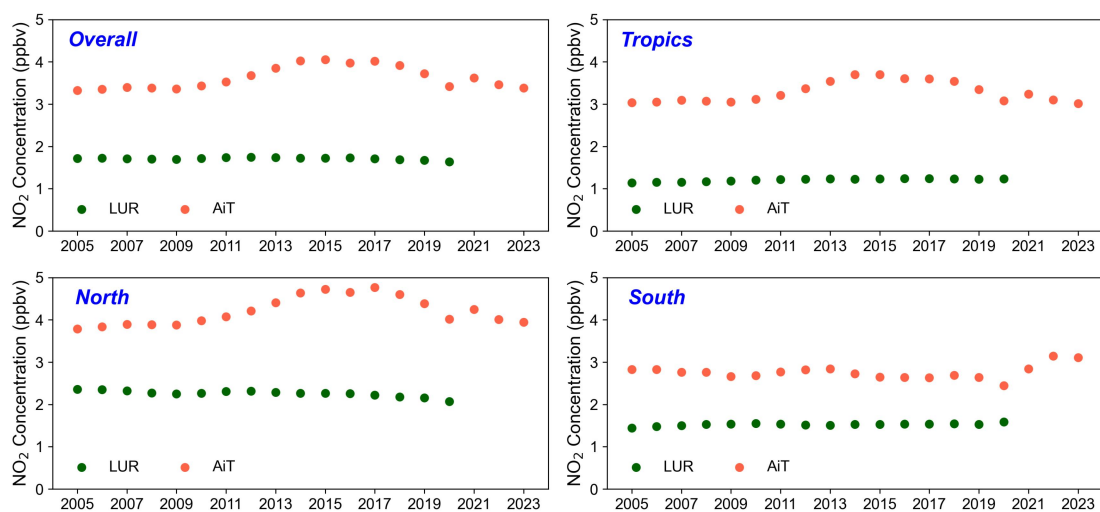

Figure S4: Comparison of area-weighted  $\text{NO}_2$  concentrations estimated by LUR and AiT methods across different

global regions (a, global; b, the Tropics; c, Northern Hemisphere; d, Southern Hemisphere) during 2005-2023.

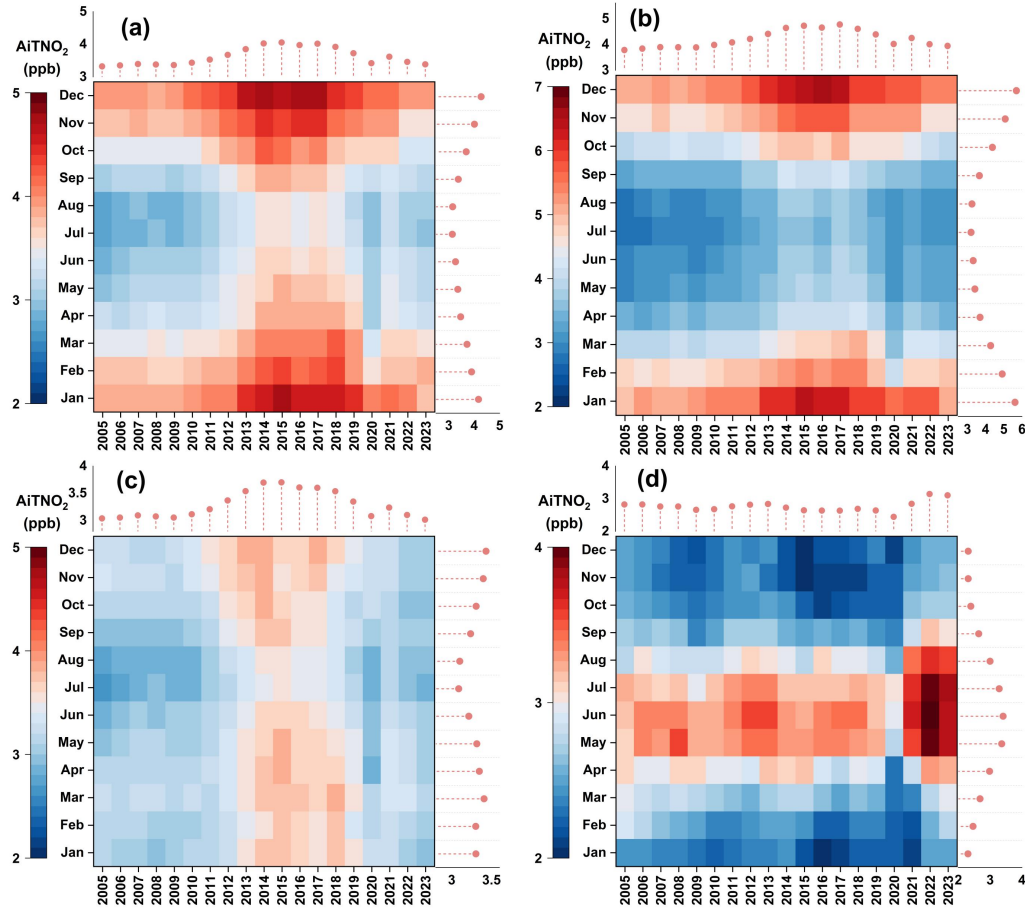

Figure S5: Temporal variations in area-weighted average  $\text{AiTNO}_2$  concentrations (2005-2023) with heat maps representing monthly data (x-axis: year, y-axis: month), annual averages displayed as dot plots above, and monthly averages displayed as dot plots on the right for global (a), the Northern Hemisphere (30°N to 60°N) (b), the tropics (30°N to 30°S) (c), and the Southern Hemisphere (30°S to 60°S) (d).

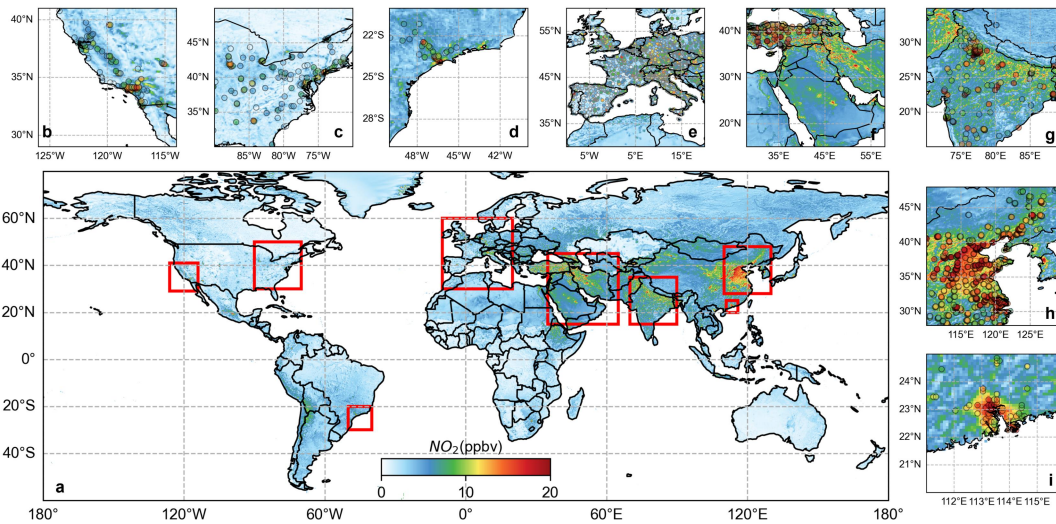

Figure S6: a: 0.1 degree gapless  $\text{NO}_2$  global map based on annual average concentration in 2020 (unit: ppbv). Zoomed-in maps (outlined by red rectangles) showing  $\text{AiT-NO}_2$  and ground-based  $\text{NO}_2$  measurements (colored dots) over the b: western United States, c: eastern United States, d: central South America, e: Europe, f: Arabian Peninsula, g: India, h: eastern China, and i: southern China.



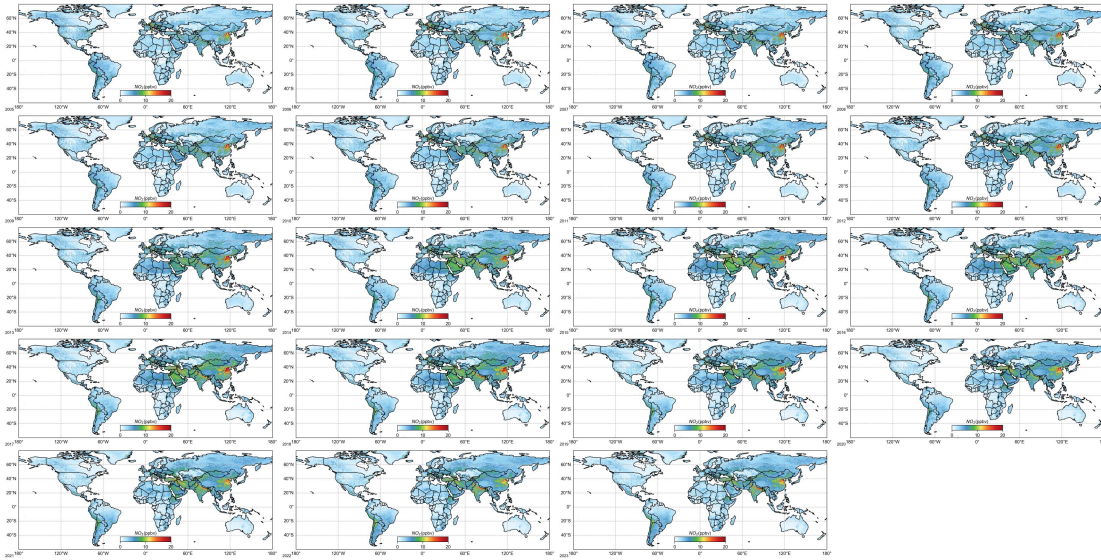

Figure S7: Annual global NO<sub>2</sub> concentration (AiTNO<sub>2</sub>) at  $0.1^\circ \times 0.1^\circ$  from 2005 to 2023. Each subfigure represents the data for a specific year, arranged from left to right and top to bottom, starting with 2005 (top left) and ending with 2023 (bottom right).

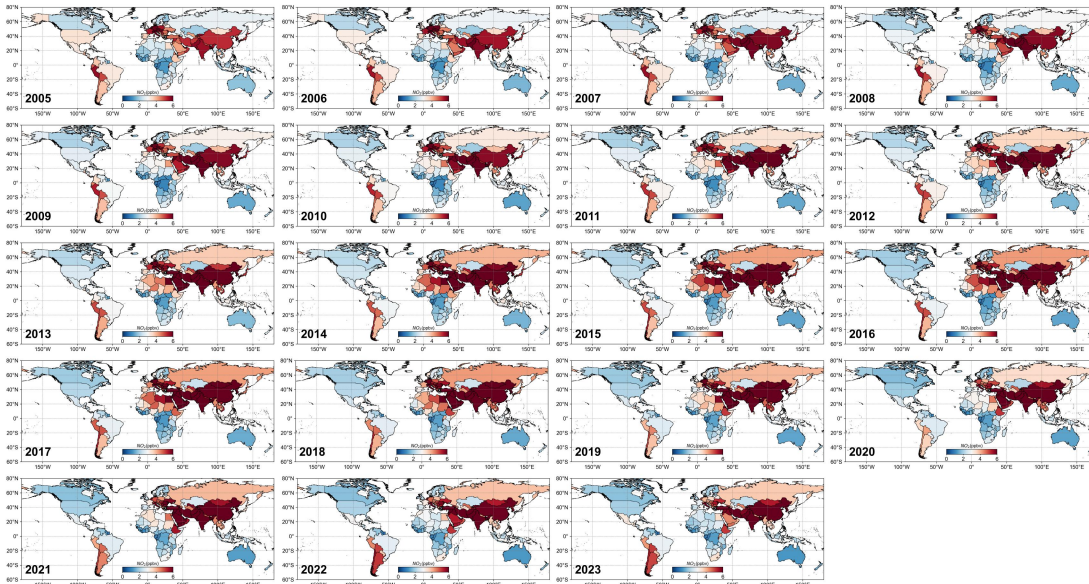

Figure S8: Annual area-weighted average NO<sub>2</sub> concentration data (AiTNO<sub>2</sub>) by country from 2005 to 2023. Each subfigure represents the data for a specific year, arranged from left to right and top to bottom, starting with 2005 (top left) and ending with 2023 (bottom right).

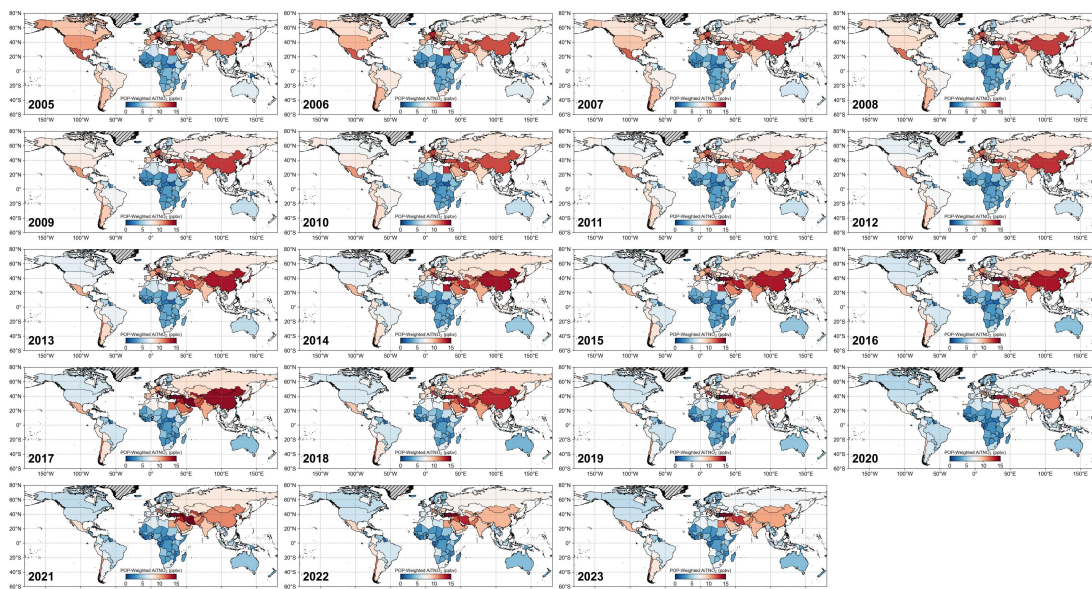

Figure S9: Annual population-weighted average NO<sub>2</sub> concentration by country from 2005 to 2023. Each subfigure represents the data for a specific year, arranged from left to right and top to bottom, starting with 2005 (top left) and ending with 2023 (bottom right).

Table S1. The regional NO<sub>2</sub> concentration underestimation through LUR method compared with the AiT method from 2005 to 2020.

| <b>Year</b>    | <b>SEAO</b> | <b>CEECA</b> | <b>HI</b> | <b>LAC</b> | <b>NAME</b> | <b>SA</b> | <b>SSA</b> |
|----------------|-------------|--------------|-----------|------------|-------------|-----------|------------|
| <b>2005</b>    | -56.7%      | -60.8%       | -29.5%    | -63.0%     | -66.1%      | -53.4%    | -65.5%     |
| <b>2006</b>    | -57.0%      | -61.2%       | -28.9%    | -62.7%     | -67.5%      | -54.3%    | -64.8%     |
| <b>2007</b>    | -58.3%      | -61.3%       | -29.2%    | -63.4%     | -68.9%      | -54.7%    | -63.9%     |
| <b>2008</b>    | -56.8%      | -62.9%       | -29.9%    | -62.0%     | -69.5%      | -53.6%    | -63.1%     |
| <b>2009</b>    | -55.8%      | -64.1%       | -30.4%    | -59.5%     | -69.8%      | -53.6%    | -61.9%     |
| <b>2010</b>    | -52.9%      | -66.0%       | -30.6%    | -58.7%     | -71.2%      | -52.5%    | -63.2%     |
| <b>2011</b>    | -52.3%      | -67.4%       | -30.5%    | -58.3%     | -71.9%      | -52.8%    | -64.7%     |
| <b>2012</b>    | -55.7%      | -68.5%       | -32.3%    | -58.9%     | -72.9%      | -53.5%    | -65.7%     |
| <b>2013</b>    | -60.7%      | -69.5%       | -33.5%    | -56.9%     | -75.0%      | -55.2%    | -67.9%     |
| <b>2014</b>    | -63.8%      | -71.5%       | -31.9%    | -55.6%     | -77.7%      | -58.0%    | -68.9%     |
| <b>2015</b>    | -65.2%      | -71.7%       | -29.0%    | -55.7%     | -78.0%      | -58.5%    | -68.5%     |
| <b>2016</b>    | -66.7%      | -71.4%       | -26.1%    | -54.7%     | -77.1%      | -57.3%    | -66.9%     |
| <b>2017</b>    | -68.3%      | -72.2%       | -27.5%    | -53.4%     | -77.5%      | -53.4%    | -68.2%     |
| <b>2018</b>    | -67.0%      | -72.9%       | -29.2%    | -51.2%     | -76.2%      | -54.8%    | -69.3%     |
| <b>2019</b>    | -66.4%      | -71.2%       | -26.9%    | -49.6%     | -73.9%      | -52.4%    | -68.4%     |
| <b>2020</b>    | -64.5%      | -68.6%       | -21.9%    | -46.9%     | -70.7%      | -51.0%    | -65.2%     |
| <b>Average</b> | -60.5%      | -67.6%       | -29.2%    | -56.9%     | -72.7%      | -54.3%    | -66.0%     |
